# Supplementary material
Source: PubMed Central journal article supplement (PMC7094250)
Supplement: mmc1.pdf [file mmc1.pdf]

## Exhaled Air Dispersion During Noninvasive Ventilation via Helmets and a Total Facemask

David S. Hui, MD, FCCP; Benny K. Chow, PhD; Thomas Lo, MSc; Susanna S. Ng, MBChB; Fanny W. Ko, MD, FCCP; Tony Gin, MD; and Matthew T. V. Chan, MD

CHEST 2015; 147(5):1336-1343

**e-Figure 1.**

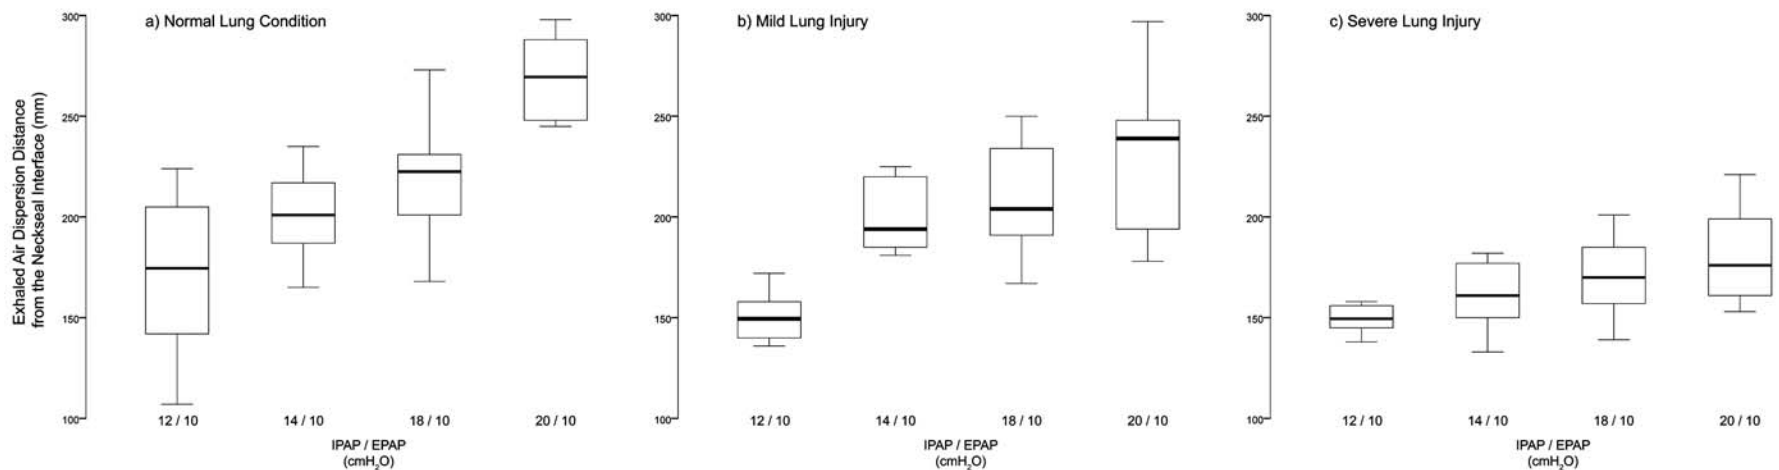

*Online supplements are not copyedited prior to posting.*

**e-Figure 2.**

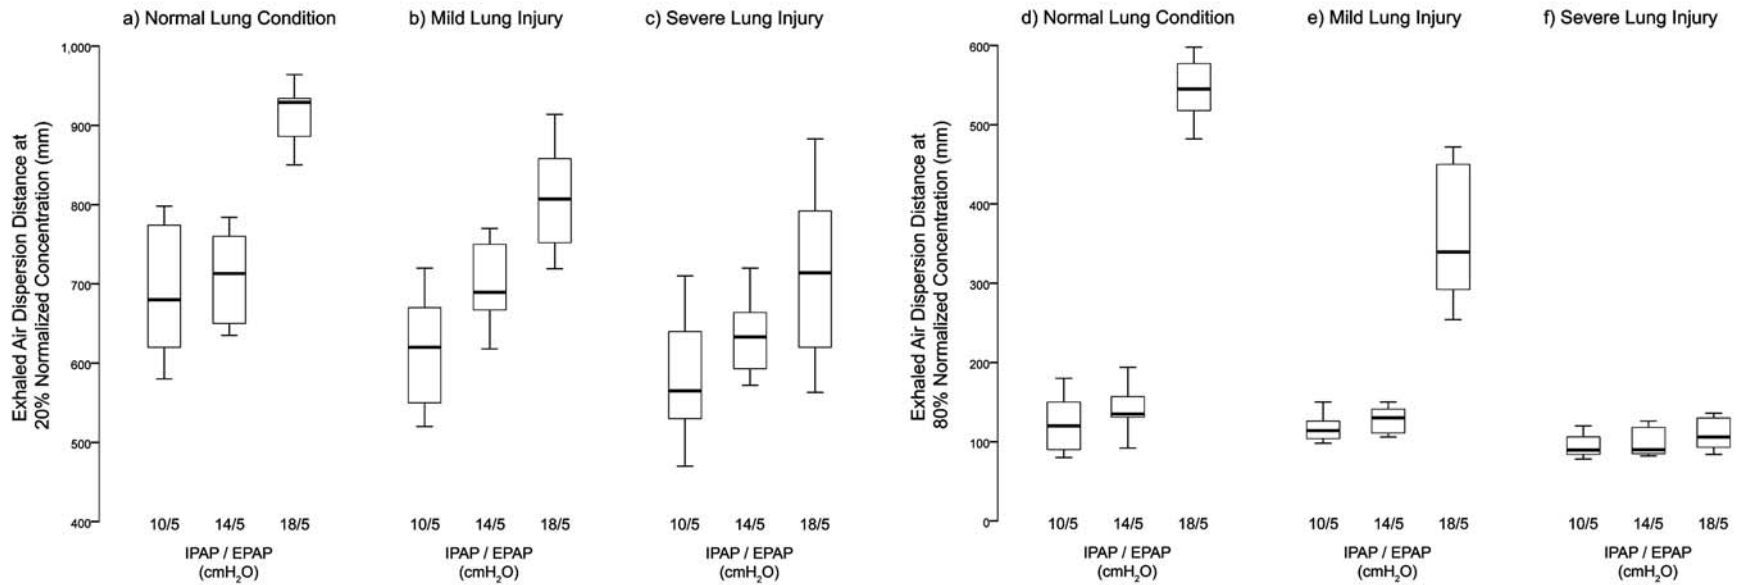

*Online supplements are not copyedited prior to posting.*
